# Supplementary material for: Palladium nanoparticles-confined pore-engineered urethane-linked thiol-functionalized covalent organic frameworks: a high-performance catalyst for the Suzuki Miyaura cross-coupling reaction
Source: Royal Society of Chemistry journal article supplement (doi:10.1039/d2dt04057c), 2023-01-01
Supplement: d2dt04057c1.pdf [file d2dt04057c1.pdf]

**Palladium nanoparticles confined pore engineered urethane linked thiol functionalized  
covalent organic framework: A high-performance catalyst for Suzuki Miyuara cross-  
coupling reaction**

**Falguni Shukla , Miraj Patel , Qureshi Gulamnabi , Sonal Thakore\***

Department of Chemistry, Faculty of Science, The Maharaja Sayajirao University of Baroda,  
Vadodara, 390002, India.

\*Authors for correspondence E-mail: [chemistry2797@yahoo.com](mailto:chemistry2797@yahoo.com), [drsonalit@gmail.com](mailto:drsonalit@gmail.com)  
(Thakore, S.)

**Table of contents**

- 1. Elemental Mapping of UCOF and UCOF-SH**
- 2. TGA plot of UCOF**
- 3. TGA plot of PdNPs@UCOF-SH**
- 4. XPS Full scan spectrum of a catalyst**
- 5. Deconvoluted XPS spectra of C, N, O, S**
- 6. Effect of catalyst loading**
- 7. Effect of EtOH: H<sub>2</sub>O ratio as a solvent**
- 8. Recycling study**
- 9. Stability study**
- 10. Heterogeneity test**
- 11. Elemental Mapping of recycled catalyst**
- 12. <sup>1</sup>H NMR spectra of the coupling products**

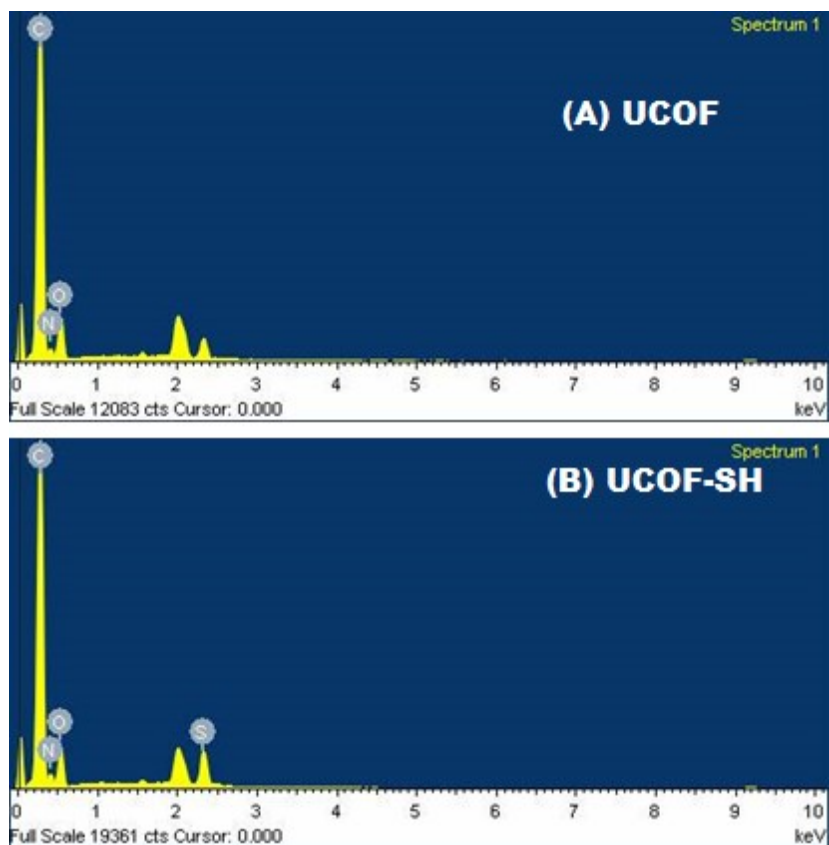

Figure S1: Elemental Mapping of (A) UCOF and (B) UCOF-SH

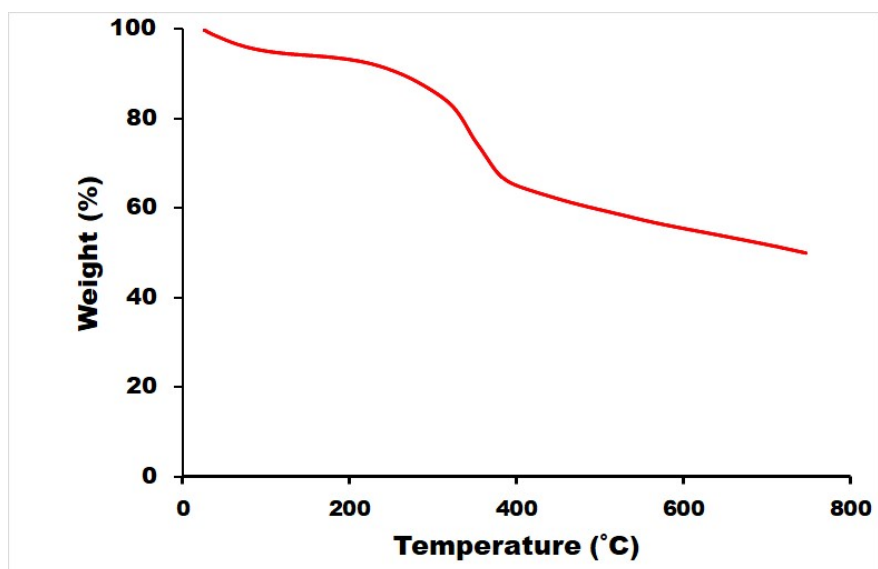

Figure S2: TGA plot of UCOF

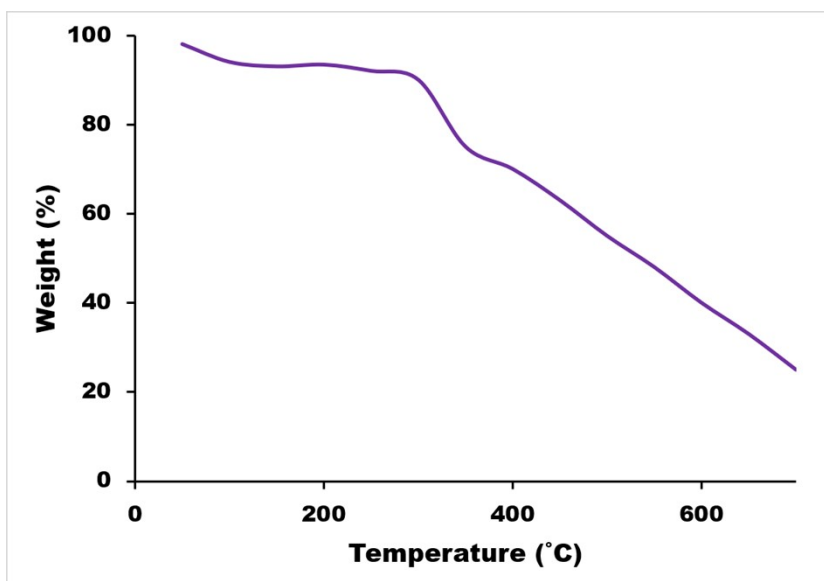

Figure S3: TGA plot of PdNPs@UCOF-SH

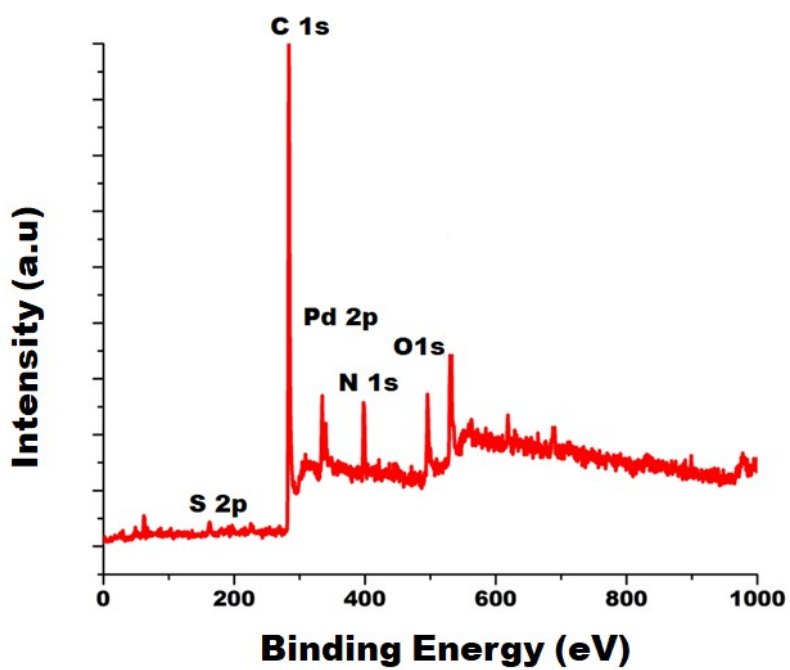

Figure S4: Full scan XPS spectrum of PdNPs@UCOF-SH catalyst

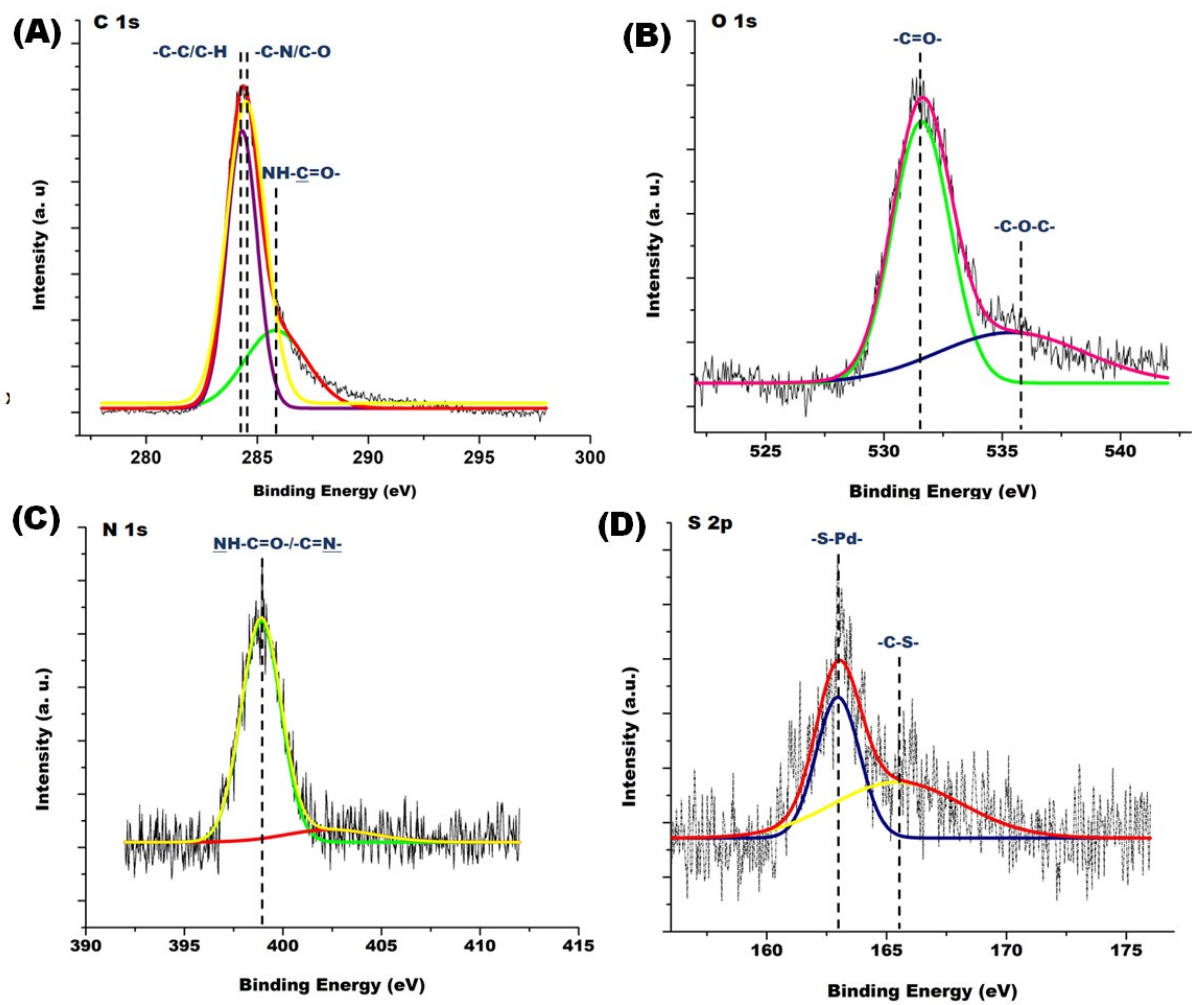

Figure S5: Deconvoluted XPS spectra of (A) C 1s (B) O 1s (C) N 1s and (D) S2p

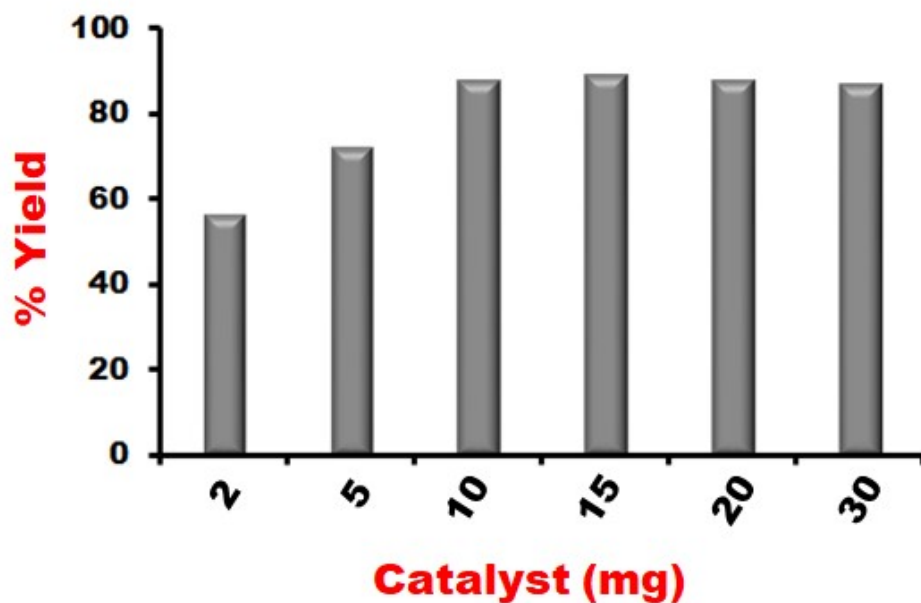

**Figure S6: Effect of catalyst loading (Reaction Condition: Bromobenzene (0.5 mmol), phenylboronic acid (0.75 mmol), 1.0 mmol of  $\text{Cs}_2\text{CO}_3$ , (x mg) PdNPs@UCOF-SH, and solvent EtOH:  $\text{H}_2\text{O}$  5 mL, Isolated Yield).**

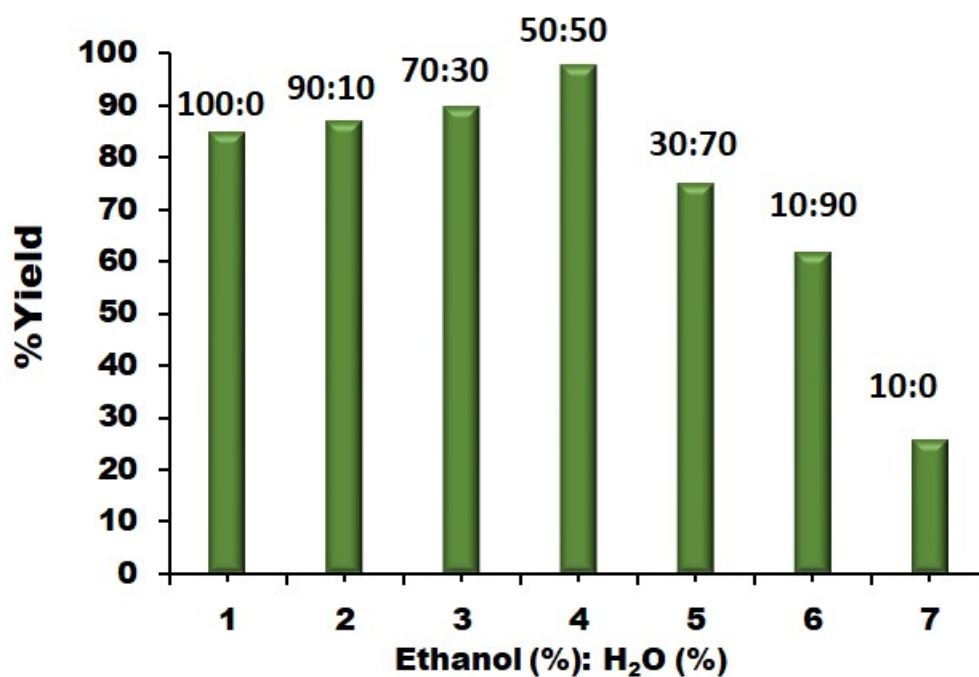

**Figure S7: Effect of EtOH:  $\text{H}_2\text{O}$  ratio as a solvent on cross-coupling reaction (Reaction Conditions: Bromobenzene (0.5 mmol), phenylboronic acid (0.75 mmol), 1.0 mmol of  $\text{Cs}_2\text{CO}_3$ , 0.75 mol % of PdNPs@UCOF-SH, and solvent EtOH:  $\text{H}_2\text{O}$  5 mL, Isolated Yield).**

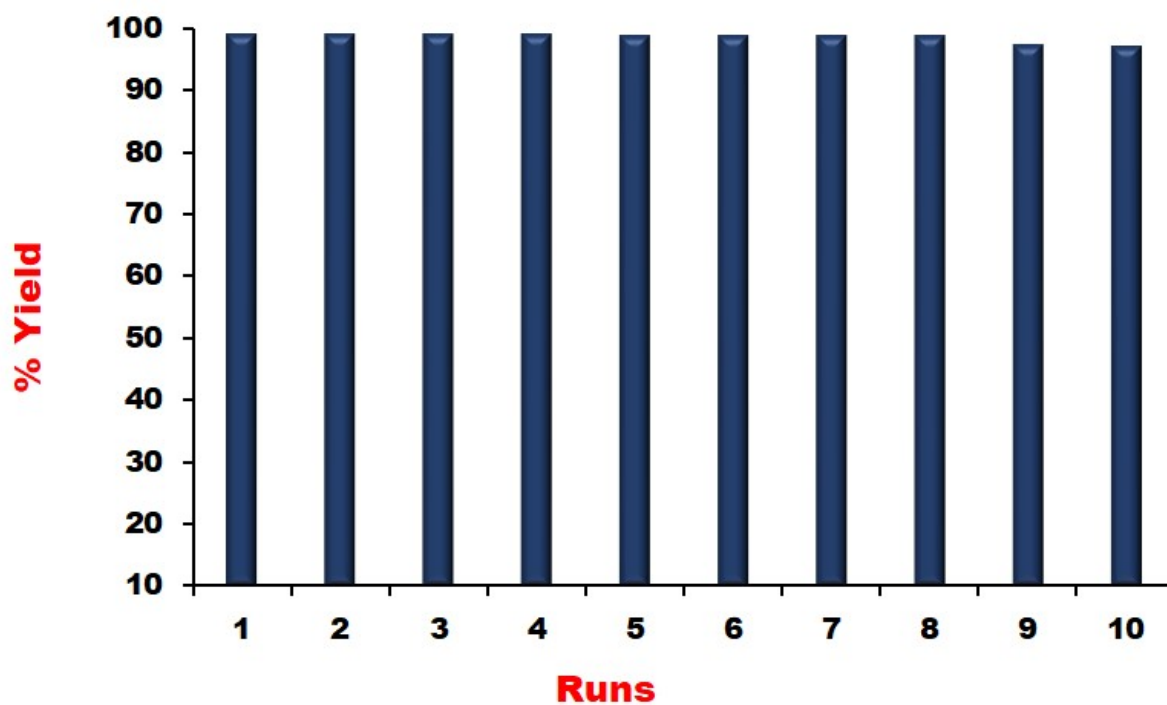

**Figure S8: Recycling study** (Reaction Conditions: Bromobenzene (0.5 mmol), phenylboronic acid (0.75 mmol), 1.0 mmol of  $\text{Cs}_2\text{CO}_3$ , 0.75 mol % of PdNPs@UCOF-SH, and solvent EtOH:  $\text{H}_2\text{O}$  5 mL, Isolated Yield).

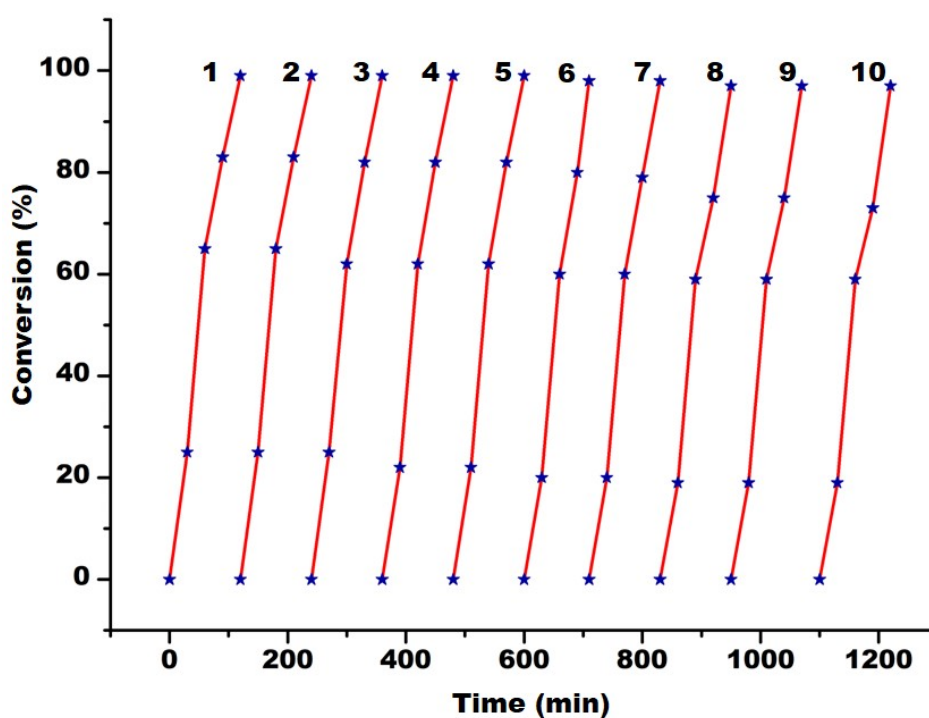

**Figure S9: The stability study of PdNPs@UCOF-SH catalyst**

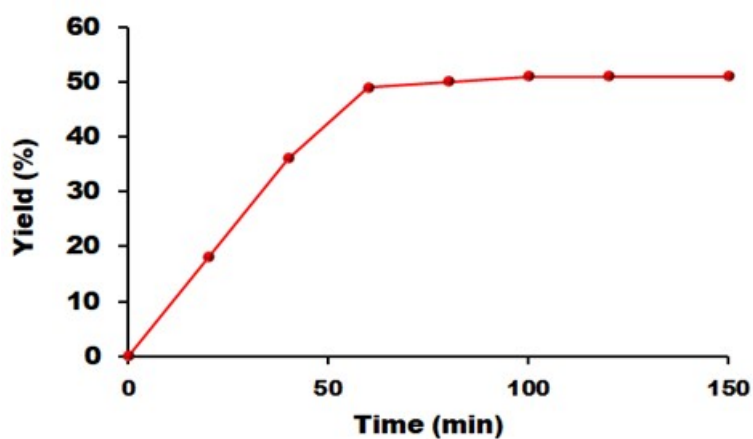

**Figure S10: Heterogeneity test** (: Bromobenzene (0.5 mmol), phenylboronic acid (0.75 mmol), 1.0 mmol of  $\text{Cs}_2\text{CO}_3$ , 0.75 mol % of PdNPs@UCOF-SH, and solvent EtOH:  $\text{H}_2\text{O}$  5 ml).

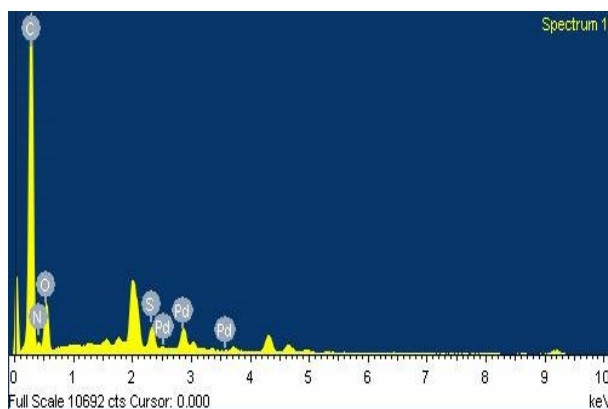

**Figure S11: Elemental Mapping of the recycled catalyst after the 10<sup>th</sup> cycle**

## NMR Spectra

### 1,1'-Biphenyl

$^1\text{H}$  NMR (500 MHz,  $\text{CDCl}_3$ ):  $\delta$ 7.58(t,  $J$ = 7.8 Hz, 4H), 7.41-7.45 (m, 4H), 7.34 (t,  $J$ =7.5Hz, 2H) ppm

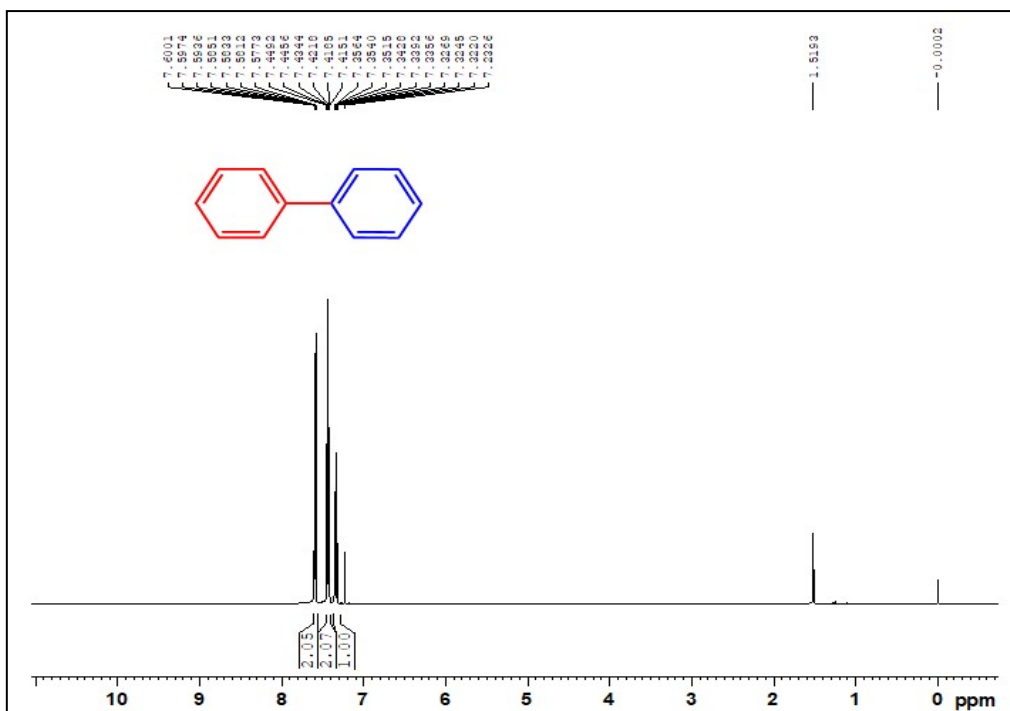

Figure S12:  $^1\text{H}$  NMR of 1,1'-Biphenyl

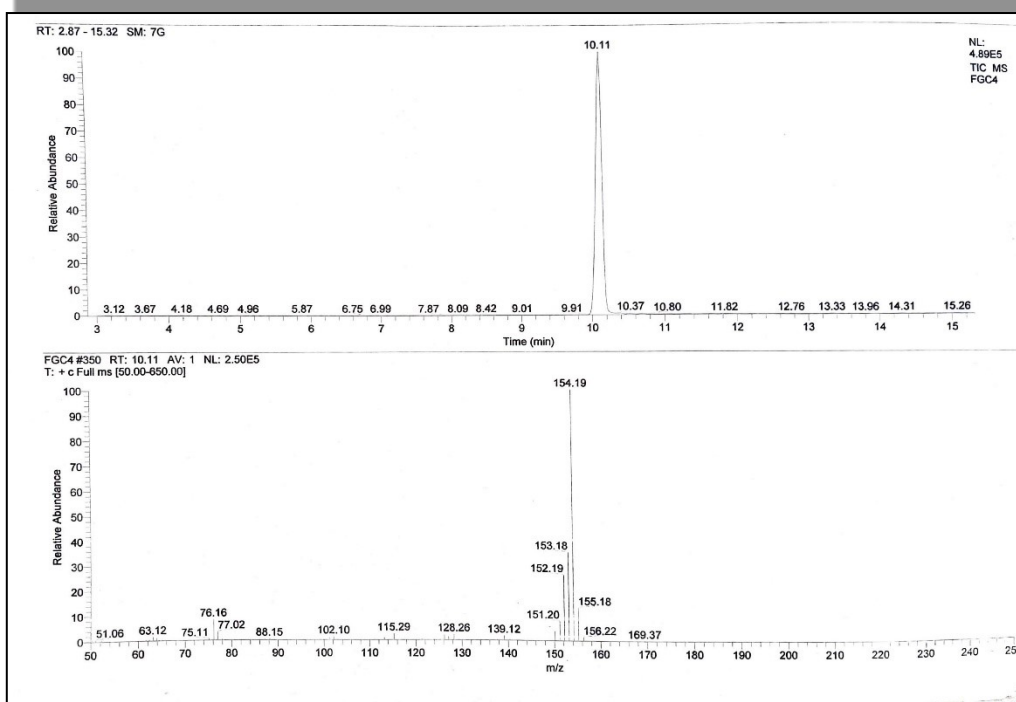

Figure S13: GC-MS spectrum of 1,1'-Biphenyl

#### 4-Methoxy-1,1'-biphenyl

$^1\text{H}$  NMR (400 MHz,  $\text{CDCl}_3$ ):  $\delta$  7.57-7.59(m, 4H), 7.48 (t,  $J = 7.5$  Hz, 2H), 7.17 (t,  $J = 6.2$  Hz, 1H), 6.99 (d,  $J = 8.8$  Hz, 2H), 3.88 (s, 3H) ppm.



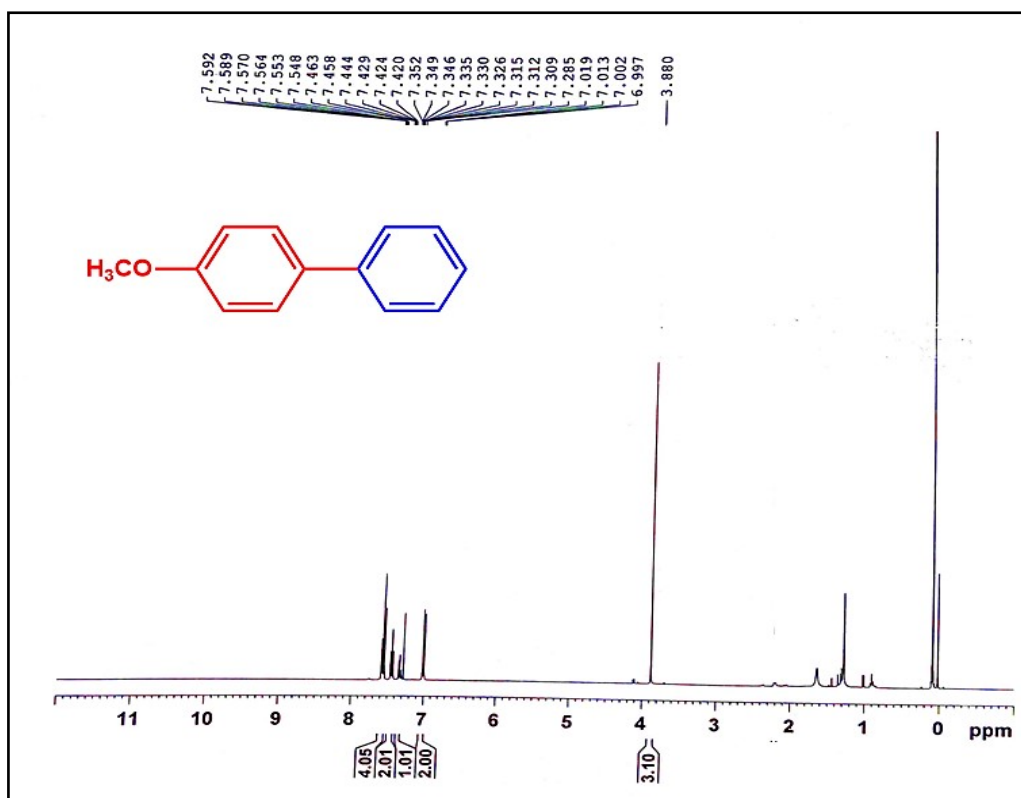

Figure S14: <sup>1</sup>H NMR of 4-Methoxy-1,1'-biphenyl

### 4,4'-Dimethoxy-1,1'-biphenyl

$^1\text{H NMR}$  (500 MHz,  $\text{CDCl}_3$ ):  $\delta$  7.33 (d,  $J = 8.9$  Hz, 2H), 6.73 (d,  $J = 8.9$  Hz, 2H), 3.71 (s, 3H) ppm

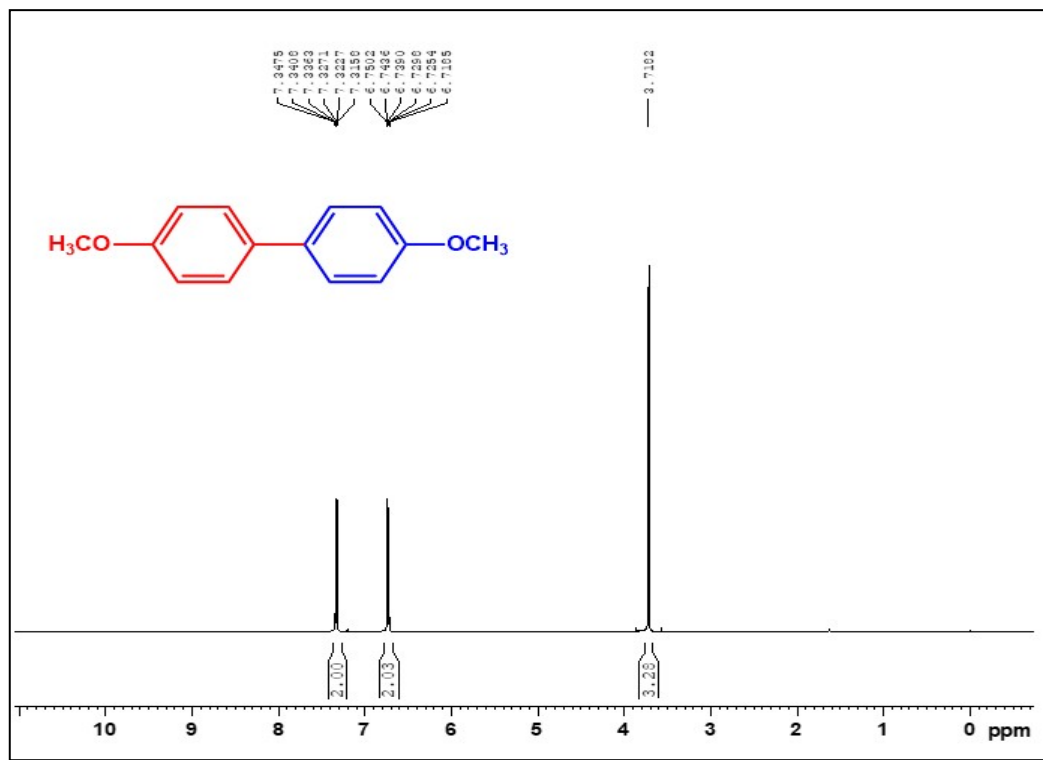

Figure S15:  $^1\text{H NMR}$  of 4,4'-Dimethoxy-1,1'-biphenyl

### 4-Acetyl-1,1'-biphenyl

$^1\text{H}$  NMR (500 MHz,  $\text{CDCl}_3$ ):  $\delta$  8.02 (d,  $J = 8.4$  Hz, 2H), 7.64 (d,  $J = 8.4$  Hz, 2H), 7.55 (d,  $J = 8.0$  Hz, 2H), 7.46 (d,  $J = 8.0$  Hz, 2H), 7.29 (t,  $J = 8.0$  Hz, 1H), 2.63 (s, 3H)ppm.

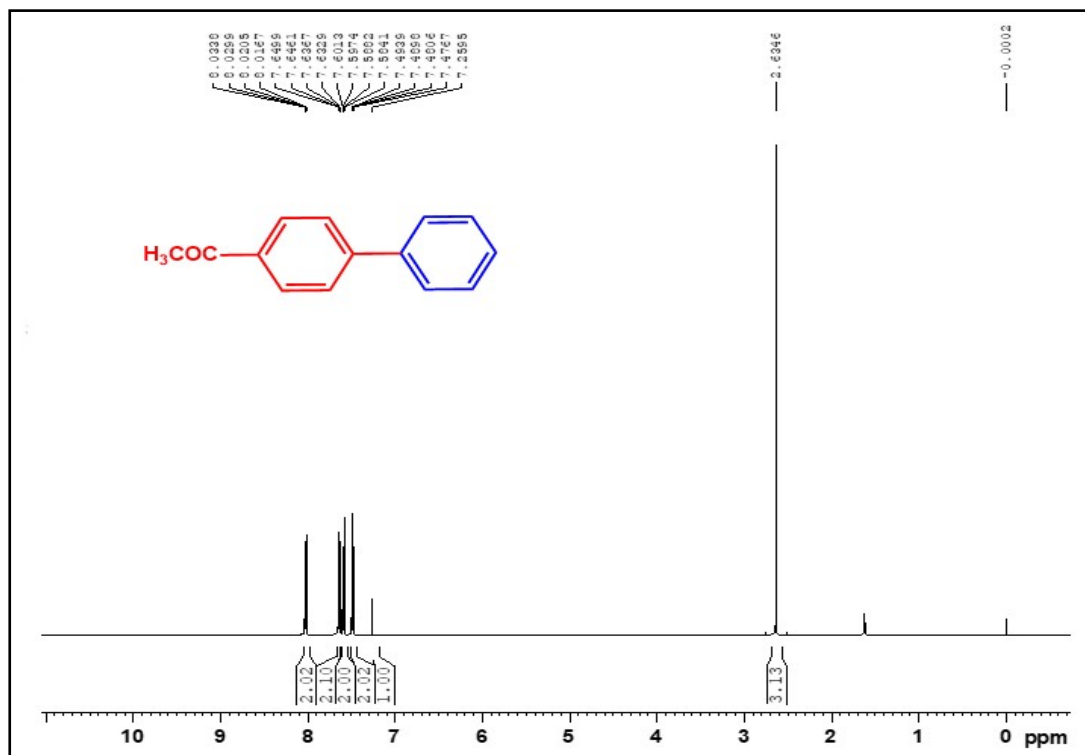

Figure S16:  $^1\text{H}$  NMR of 4-Acetyl-1,1'-biphenyl

## 4-Cyano-p-terphenyl

$^1\text{H}$  NMR (500 MHz,  $\text{CDCl}_3$ ):  $\delta$  8.12 (t,  $J = 6.15$  Hz, 2H), 7.67 (t,  $J = 6.4$  Hz, 1H), 7.55-7.33 (m, 10H) ppm.

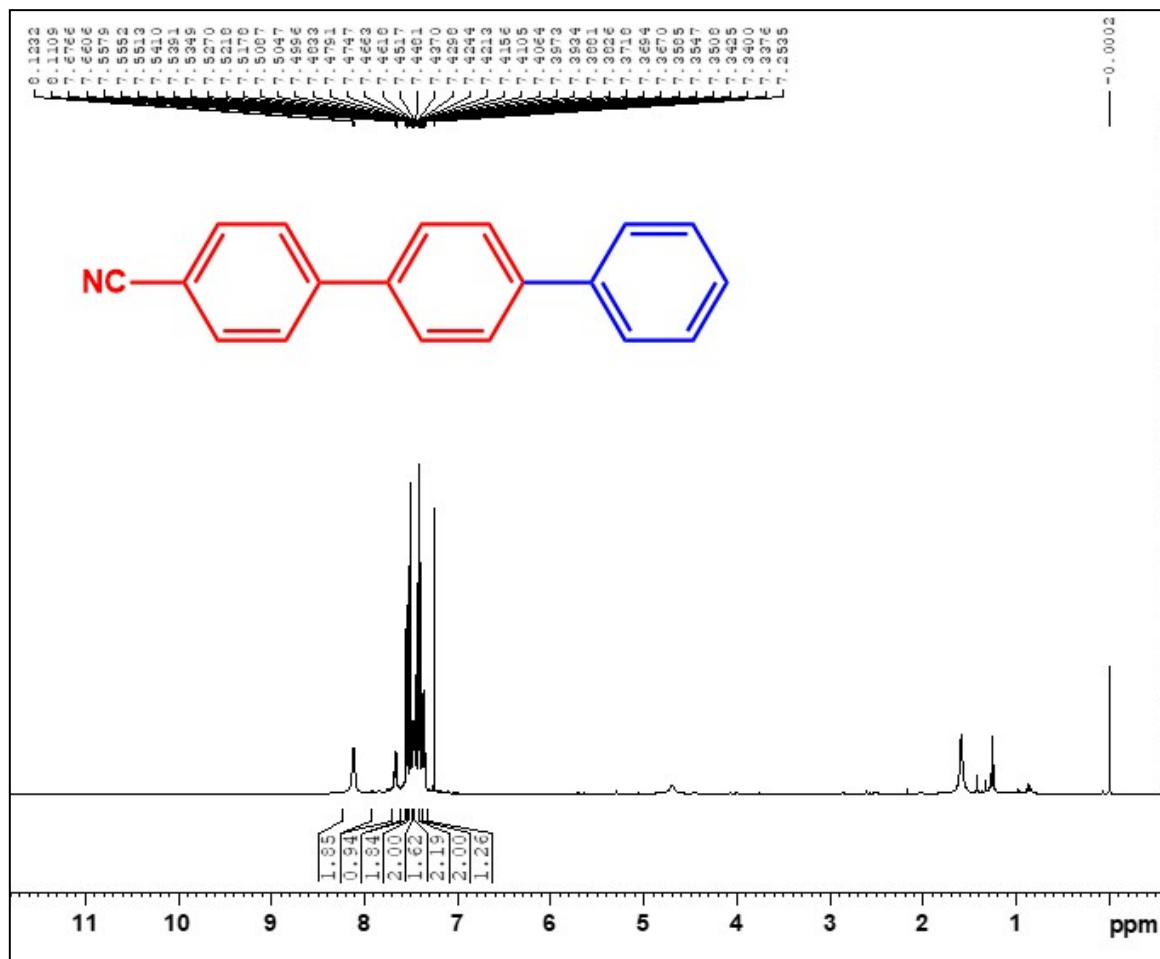

Figure S17:  $^1\text{H}$  NMR of 4-Cyano-p-terphenyl

### 3-Flouro-4-nitro-4'-flouro-1,1'-biphenyl

$^1\text{H NMR}$  (500 MHz,  $\text{CDCl}_3$ ):  $\delta$  8.23 (d,  $J=6.85$  Hz, 2 H), 7.73 (s, 1H), 7.59 (d,  $J=7.1$  Hz, 1H), 7.59-7.46 (m, 2H), 7.41-7.38(m, 1H) ppm.

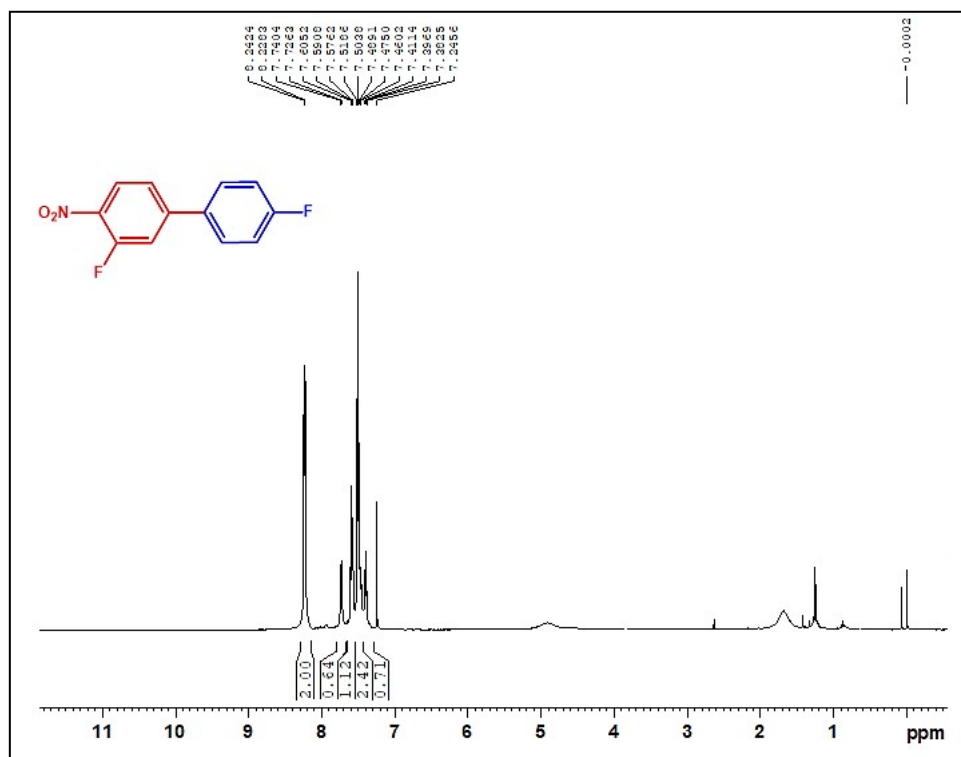

Figure S18:  $^1\text{H NMR}$  of 3-Flouro-4-nitro-4'-flouro-1,1'-biphenyl

### 4-Cyano-4'-flouro-1,1'- biphenyl

$^1\text{H}$  NMR (500 MHz,  $\text{CDCl}_3$ ): 7.73-7.64 (m, 4H), 7.49 (d,  $J = 8.0$  Hz, 2H), 7.29 (d,  $J = 8.0$  Hz, 2H) ppm.

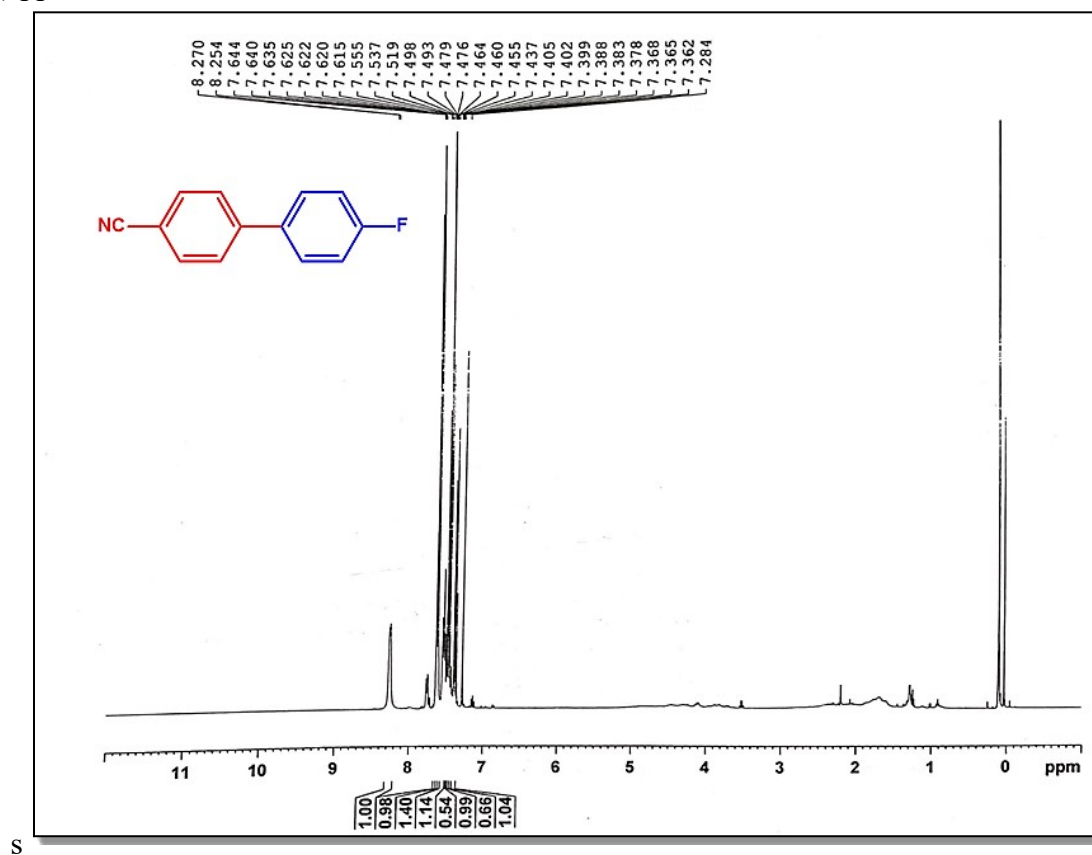

Figure S19:  $^1\text{H}$  NMR of 4-Cyano-4'-flouro-1,1'- biphenyl

## 4-Methyl-1,1'-biphenyl

$^1\text{H}$  NMR (400 MHz,  $\text{CDCl}_3$ ):  $\delta$  2.2 (s, 3H), 7.00 (d,  $J = 8.8$  Hz, 2H), 7.33 (t,  $J = 7.6$  Hz, 1H), 7.43 (t,  $J = 7.8$  Hz, 2H), 7.51 (m, 4H) ppm.

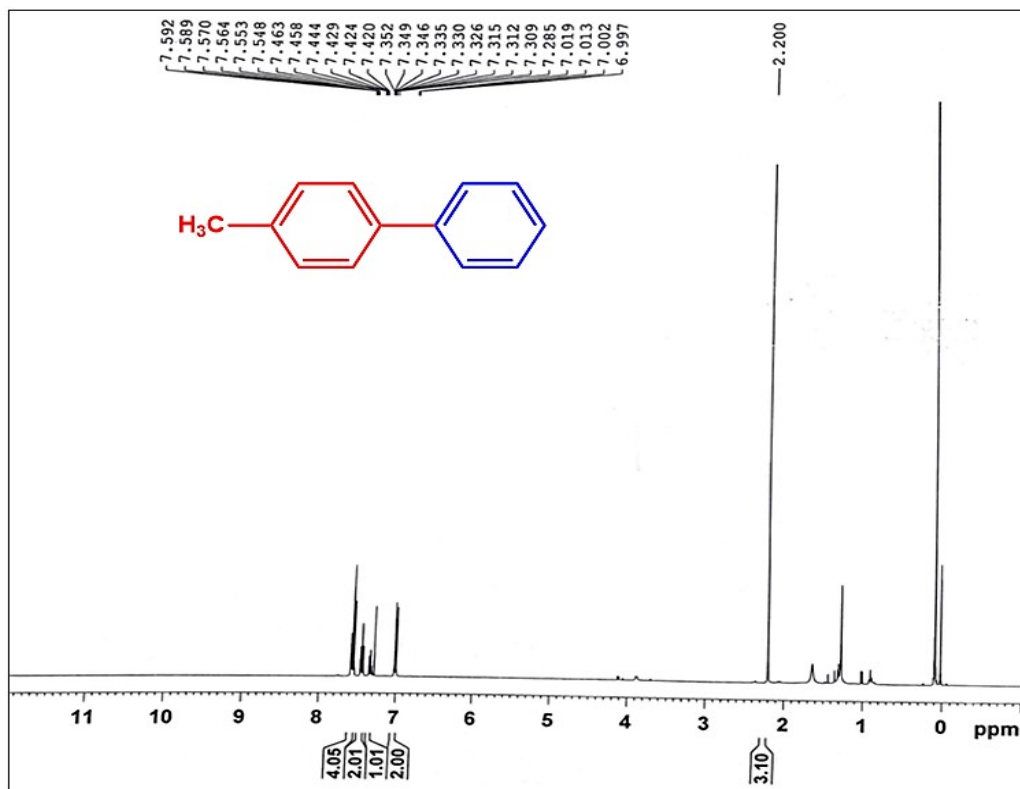

Figure S20:  $^1\text{H}$  NMR of 4-Methyl-1,1'-biphenyl

#### 4-Flouro-4'-methyl-1,1'- biphenyl

$^1\text{H}$  NMR (500 MHz,  $\text{CDCl}_3$ ):  $\delta$  2.63 (s, 3H), 7.48 (d,  $J = 7.5$  Hz, 2H), 7.58 (d,  $J = 8.4$  Hz, 2H), 7.64 (d,  $J = 8.1$  Hz, 2H), 8.02 (d,  $J = 8.5$  Hz, 2H) ppm

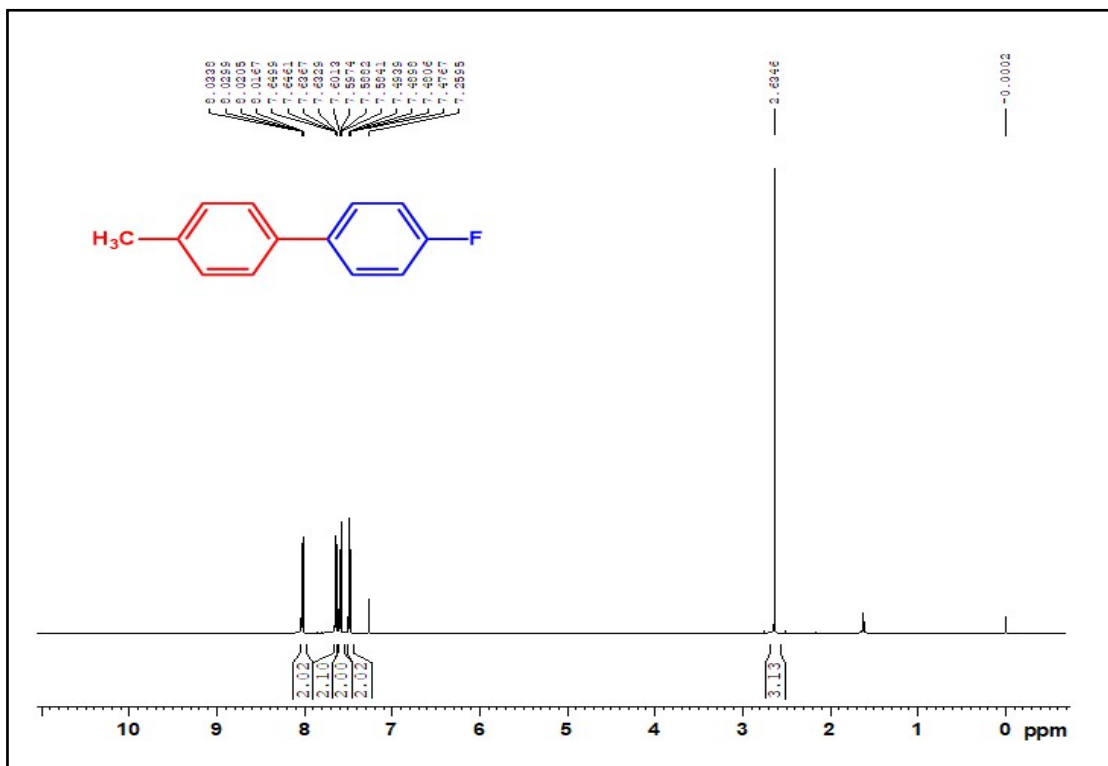

Figure S21:  $^1\text{H}$  NMR of 4-Flouro-4'-methyl-1,1'- biphenyl

#### References:

1. Y. Jiang, C. Liu and A. Huang, *ACS Appl. Mater. Interfaces*, 2019, **11**, 32186–32191.
2. J. Yang, Y. Wu, X. Wu, W. Liu, Y. Wang and J. Wang, *Green Chem.*, 2019, **21**, 5267–5273.
3. S. Scott, *ACS Catal.* 2018, **8**, 8597.
4. R. Yun, W. Ma, S. Wang, W. Jia and B. Zheng., *Inorg. Chem.* 2019, **58**, 6137
